# Supplementary material
Source: MDPI journal article supplement (https://www.mdpi.com/1999-4907/8/7/227)
Supplement: s1 [file s1]

**Table S1.** Allele size of 10 chloroplast loci and 2 mitochondrial loci in the studied individuals from five age classes of *Pinus sylvestris.*

| **Class** | **Pt26081** | **Pt36480** | **Pt45002** | **PCP1289** | **PCP87314** | **PCP41131** | **Pt71936** | **PCP102652** | **Pt15169** | **Pt30204** | ***nad* 1** | ***nad 7*** |
| --- | --- | --- | --- | --- | --- | --- | --- | --- | --- | --- | --- | --- |
| E | 106 | 142 | 168 | 105 | 112 | 135 | 144 | 114 | 127 | 144 | 217 | 1170 |
| E | 106 | 142 | 168 | 104 | 112 | 135 | 145 | 114 | 126 | 142 | 217 | 1170 |
| E | 106 | 142 | 169 | 104 | 112 | 135 | 145 | 114 | 126 | 141 | 217 | 1170 |
| E | 106 | 142 | 169 | 103 | 112 | 135 | 144 | 114 | 125 | 142 | 217 | 1175 |
| E | 106 | 142 | 168 | 104 | 112 | 135 | 146 | 114 | 125 | 143 | 217 | 1175 |
| E | 108 | 142 | 169 | 105 | 112 | 135 | 147 | 114 | 126 | 142 | 217 | 1170 |
| E | 106 | 142 | 169 | 104 | 113 | 135 | 144 | 114 | 127 | 143 | 217 | 1175 |
| E | 106 | 142 | 168 | 104 | 112 | 135 | 145 | 114 | 127 | 142 | 217 | 1175 |
| E | 105 | 142 | 169 | 103 | 112 | 136 | 145 | 114 | 128 | 142 | 217 | 1175 |
| E | 106 | 142 | 170 | 104 | 112 | 135 | 145 | 114 | 126 | 141 | 217 | 1175 |
| E | 106 | 142 | 168 | 105 | 112 | 135 | 145 | 114 | 125 | 141 | 217 | 1175 |
| E | 106 | 142 | 169 | 105 | 112 | 135 | 145 | 114 | 126 | 140 | 217 | 1175 |
| E | 105 | 142 | 168 | 104 | 112 | 135 | 145 | 114 | 126 | 141 | 217 | 1175 |
| E | 106 | 142 | 169 | 104 | 113 | 135 | 146 | 114 | 128 | 143 | 217 | 1175 |
| E | 106 | 142 | 169 | 104 | 112 | 135 | 146 | 114 | 125 | 142 | 217 | 1175 |
| E | 106 | 142 | 169 | 104 | 112 | 135 | 146 | 114 | 127 | 141 | 217 | 1175 |
| E | 105 | 142 | 169 | 104 | 112 | 135 | 147 | 114 | 127 | 140 | 217 | 1170 |
| E | 105 | 142 | 169 | 104 | 112 | 135 | 145 | 114 | 126 | 142 | 217 | 1175 |
| E | 106 | 142 | 169 | 104 | 112 | 135 | 146 | 114 | 125 | 144 | 217 | 1175 |
| E | 106 | 142 | 169 | 104 | 111 | 135 | 145 | 114 | 127 | 143 | 217 | 1170 |
| E | 105 | 142 | 169 | 104 | 112 | 135 | 145 | 114 | 127 | 142 | 217 | 1170 |
| E | 105 | 142 | 169 | 104 | 112 | 135 | 145 | 114 | 125 | 141 | 217 | 1175 |
| E | 105 | 142 | 169 | 104 | 112 | 135 | 145 | 114 | 125 | 141 | 217 | 1175 |
| E | 106 | 142 | 170 | 104 | 112 | 135 | 146 | 114 | 126 | 142 | 217 | 1175 |
| E | 106 | 142 | 169 | 104 | 114 | 136 | 145 | 114 | 125 | 144 | 217 | 1175 |
| E | 106 | 142 | 169 | 104 | 112 | 135 | 147 | 114 | 125 | 142 | 217 | 1175 |
| E | 105 | 142 | 169 | 103 | 112 | 135 | 146 | 114 | 128 | 141 | 217 | 1175 |
| E | 106 | 142 | 169 | 104 | 112 | 135 | 145 | 114 | 126 | 142 | 217 | 1175 |
| E | 106 | 142 | 168 | 105 | 112 | 139 | 147 | 114 | 126 | 142 | 217 | 1175 |
| E | 106 | 142 | 169 | 104 | 112 | 135 | 146 | 114 | 127 | 140 | 217 | 1175 |
| E | 106 | 142 | 169 | 104 | 112 | 135 | 146 | 114 | 126 | 143 | 217 | 1170 |
| S | 106 | 142 | 169 | 105 | 112 | 135 | 146 | 114 | 126 | 142 | 217 | 1175 |
| S | 106 | 142 | 169 | 104 | 112 | 135 | 145 | 114 | 126 | 141 | 217 | 1170 |
| S | 107 | 142 | 169 | 104 | 112 | 135 | 145 | 114 | 125 | 144 | 217 | 1175 |
| S | 105 | 142 | 168 | 105 | 113 | 135 | 145 | 114 | 126 | 142 | 217 | 1170 |
| S | 106 | 142 | 169 | 104 | 113 | 135 | 145 | 114 | 127 | 142 | 217 | 1170 |
| S | 106 | 142 | 169 | 104 | 112 | 135 | 145 | 114 | 127 | 142 | 217 | 1175 |
| S | 106 | 142 | 165 | 104 | 112 | 135 | 145 | 114 | 126 | 142 | 217 | 1175 |
| S | 105 | 142 | 169 | 104 | 112 | 135 | 146 | 114 | 126 | 143 | 217 | 1175 |
| S | 106 | 141 | 169 | 104 | 111 | 135 | 144 | 114 | 125 | 142 | 217 | 1175 |
| S | 106 | 142 | 168 | 104 | 112 | 134 | 146 | 114 | 125 | 145 | 217 | 1175 |
| S | 107 | 142 | 169 | 103 | 113 | 135 | 146 | 114 | 126 | 144 | 217 | 1175 |
| S | 106 | 142 | 168 | 104 | 113 | 136 | 145 | 114 | 125 | 142 | 217 | 1175 |
| S | 105 | 142 | 169 | 103 | 112 | 135 | 145 | 114 | 129 | 141 | 217 | 1175 |
| S | 106 | 141 | 169 | 104 | 113 | 135 | 145 | 114 | 126 | 142 | 217 | 1170 |
| S | 106 | 142 | 169 | 104 | 112 | 135 | 145 | 114 | 127 | 142 | 217 | 1175 |
| S | 106 | 142 | 170 | 104 | 112 | 135 | 144 | 114 | 125 | 142 | 217 | 1170 |
| S | 106 | 142 | 169 | 104 | 112 | 135 | 147 | 114 | 126 | 142 | 217 | 1175 |
| S | 106 | 142 | 169 | 104 | 112 | 135 | 145 | 114 | 124 | 143 | 217 | 1175 |
| S | 106 | 142 | 169 | 104 | 112 | 135 | 145 | 114 | 125 | 142 | 217 | 1170 |
| S | 106 | 142 | 168 | 104 | 112 | 135 | 146 | 114 | 125 | 145 | 217 | 1175 |
| S | 106 | 142 | 169 | 104 | 112 | 135 | 146 | 114 | 125 | 143 | 217 | 1170 |
| S | 106 | 142 | 168 | 104 | 112 | 135 | 145 | 114 | 128 | 144 | 217 | 1170 |
| S | 106 | 142 | 170 | 104 | 112 | 135 | 146 | 114 | 126 | 142 | 217 | 1175 |
| S | 106 | 141 | 169 | 105 | 113 | 135 | 145 | 114 | 123 | 142 | 217 | 1175 |
| S | 106 | 142 | 168 | 104 | 112 | 135 | 146 | 114 | 125 | 144 | 217 | 1175 |
| S | 106 | 142 | 169 | 105 | 112 | 135 | 147 | 114 | 126 | 141 | 217 | 1175 |
| S | 106 | 142 | 168 | 103 | 112 | 135 | 144 | 114 | 127 | 142 | 217 | 1175 |
| S | 106 | 142 | 169 | 104 | 111 | 135 | 146 | 114 | 126 | 142 | 217 | 1175 |
| S | 105 | 142 | 169 | 104 | 113 | 135 | 145 | 114 | 126 | 143 | 217 | 1175 |
| S | 105 | 142 | 168 | 104 | 112 | 135 | 145 | 114 | 127 | 143 | 217 | 1175 |
| S | 105 | 142 | 169 | 104 | 112 | 135 | 145 | 114 | 125 | 140 | 217 | 1175 |
| S | 106 | 142 | 169 | 104 | 112 | 135 | 144 | 114 | 127 | 143 | 217 | 1175 |
| Y | 106 | 142 | 170 | 105 | 112 | 135 | 147 | 114 | 127 | 142 | 217 | 1170 |
| Y | 106 | 142 | 169 | 104 | 111 | 135 | 145 | 114 | 126 | 139 | 217 | 1175 |
| Y | 106 | 142 | 169 | 104 | 112 | 135 | 146 | 114 | 126 | 142 | 217 | 1175 |
| Y | 106 | 142 | 169 | 105 | 112 | 135 | 146 | 114 | 126 | 142 | 217 | 1175 |
| Y | 106 | 142 | 169 | 104 | 112 | 135 | 145 | 114 | 127 | 143 | 217 | 1175 |
| Y | 106 | 141 | 169 | 105 | 112 | 135 | 145 | 114 | 123 | 143 | 217 | 1170 |
| Y | 106 | 142 | 169 | 104 | 112 | 134 | 145 | 114 | 124 | 143 | 217 | 1170 |
| Y | 106 | 142 | 169 | 104 | 112 | 135 | 146 | 114 | 125 | 143 | 217 | 1175 |
| Y | 106 | 142 | 169 | 104 | 111 | 135 | 145 | 114 | 126 | 140 | 217 | 1175 |
| Y | 107 | 142 | 168 | 104 | 112 | 135 | 147 | 114 | 126 | 142 | 217 | 1175 |
| Y | 105 | 142 | 168 | 104 | 112 | 135 | 145 | 114 | 127 | 143 | 217 | 1175 |
| Y | 105 | 142 | 170 | 103 | 112 | 135 | 144 | 114 | 128 | 140 | 217 | 1175 |
| Y | 105 | 142 | 169 | 104 | 113 | 135 | 144 | 114 | 128 | 143 | 217 | 1175 |
| Y | 105 | 142 | 169 | 103 | 112 | 135 | 145 | 114 | 128 | 142 | 217 | 1175 |
| Y | 105 | 142 | 170 | 104 | 112 | 135 | 145 | 114 | 125 | 141 | 217 | 1175 |
| Y | 106 | 142 | 169 | 104 | 112 | 135 | 146 | 114 | 126 | 143 | 217 | 1175 |
| Y | 105 | 142 | 169 | 104 | 112 | 135 | 146 | 114 | 126 | 140 | 217 | 1175 |
| Y | 106 | 142 | 169 | 102 | 112 | 135 | 145 | 114 | 126 | 142 | 217 | 1170 |
| Y | 106 | 142 | 170 | 104 | 112 | 135 | 145 | 114 | 127 | 142 | 217 | 1175 |
| Y | 106 | 142 | 168 | 104 | 112 | 135 | 143 | 114 | 127 | 141 | 217 | 1175 |
| Y | 106 | 141 | 169 | 105 | 112 | 135 | 145 | 114 | 123 | 142 | 217 | 1175 |
| Y | 106 | 142 | 168 | 104 | 112 | 135 | 145 | 114 | 128 | 144 | 217 | 1175 |
| Y | 106 | 142 | 169 | 104 | 112 | 135 | 145 | 114 | 127 | 140 | 217 | 1170 |
| Y | 106 | 142 | 169 | 104 | 112 | 135 | 146 | 114 | 126 | 143 | 217 | 1175 |
| Y | 106 | 142 | 168 | 104 | 112 | 135 | 147 | 114 | 125 | 145 | 217 | 1175 |
| Y | 106 | 142 | 169 | 105 | 112 | 135 | 146 | 114 | 126 | 141 | 217 | 1175 |
| Y | 106 | 142 | 168 | 104 | 112 | 135 | 146 | 114 | 125 | 145 | 217 | 1175 |
| Y | 106 | 142 | 169 | 104 | 112 | 135 | 147 | 114 | 126 | 142 | 217 | 1175 |
| Y | 105 | 142 | 170 | 103 | 112 | 135 | 144 | 114 | 128 | 140 | 217 | 1175 |
| Y | 106 | 142 | 170 | 104 | 112 | 135 | 145 | 114 | 126 | 143 | 217 | 1175 |
| Y | 105 | 142 | 169 | 104 | 113 | 135 | 145 | 114 | 125 | 142 | 217 | 1175 |
| Y | 105 | 142 | 168 | 103 | 111 | 135 | 145 | 114 | 127 | 141 | 217 | 1170 |
| M | 106 | 142 | 169 | 103 | 112 | 135 | 144 | 114 | 125 | 142 | 217 | 1175 |
| M | 105 | 142 | 169 | 104 | 112 | 135 | 145 | 114 | 128 | 142 | 217 | 1175 |
| M | 105 | 151 | 169 | 104 | 112 | 135 | 145 | 114 | 126 | 141 | 217 | 1175 |
| M | 106 | 142 | 169 | 104 | 113 | 135 | 145 | 114 | 127 | 142 | 217 | 1175 |
| M | 106 | 142 | 169 | 104 | 112 | 135 | 145 | 114 | 127 | 141 | 217 | 1175 |
| M | 107 | 142 | 169 | 105 | 113 | 135 | 145 | 114 | 126 | 142 | 217 | 1175 |
| M | 106 | 142 | 168 | 104 | 111 | 135 | 146 | 114 | 125 | 146 | 217 | 1170 |
| M | 106 | 142 | 169 | 104 | 112 | 135 | 145 | 114 | 125 | 143 | 217 | 1175 |
| M | 106 | 142 | 169 | 104 | 112 | 135 | 144 | 114 | 130 | 142 | 217 | 1170 |
| M | 106 | 142 | 168 | 104 | 113 | 135 | 144 | 114 | 127 | 142 | 217 | 1175 |
| M | 105 | 142 | 169 | 104 | 112 | 135 | 145 | 114 | 125 | 142 | 217 | 1170 |
| M | 106 | 142 | 169 | 104 | 112 | 135 | 143 | 114 | 125 | 141 | 217 | 1175 |
| M | 105 | 142 | 170 | 104 | 112 | 135 | 145 | 114 | 127 | 142 | 217 | 1175 |
| M | 106 | 142 | 169 | 104 | 112 | 135 | 146 | 114 | 126 | 144 | 217 | 1175 |
| M | 106 | 141 | 169 | 104 | 112 | 135 | 145 | 115 | 124 | 142 | 217 | 1175 |
| M | 106 | 142 | 170 | 104 | 112 | 135 | 144 | 114 | 127 | 143 | 217 | 1170 |
| M | 106 | 141 | 170 | 104 | 112 | 135 | 144 | 114 | 125 | 141 | 217 | 1175 |
| M | 106 | 142 | 169 | 104 | 113 | 135 | 145 | 114 | 128 | 141 | 217 | 1175 |
| M | 106 | 142 | 169 | 103 | 112 | 135 | 144 | 114 | 125 | 142 | 217 | 1175 |
| M | 106 | 142 | 169 | 104 | 112 | 135 | 146 | 114 | 125 | 143 | 217 | 1175 |
| M | 105 | 142 | 169 | 104 | 112 | 135 | 145 | 114 | 127 | 140 | 217 | 1175 |
| M | 106 | 142 | 169 | 105 | 112 | 135 | 147 | 114 | 126 | 141 | 217 | 1175 |
| M | 105 | 142 | 169 | 103 | 112 | 135 | 145 | 114 | 128 | 142 | 217 | 1175 |
| M | 106 | 142 | 169 | 104 | 112 | 135 | 146 | 114 | 126 | 142 | 217 | 1175 |
| M | 106 | 142 | 170 | 104 | 112 | 135 | 145 | 114 | 126 | 141 | 217 | 1175 |
| M | 106 | 141 | 170 | 104 | 112 | 135 | 144 | 114 | 125 | 141 | 217 | 1175 |
| M | 106 | 142 | 170 | 104 | 112 | 135 | 146 | 114 | 126 | 142 | 217 | 1175 |
| M | 106 | 142 | 170 | 105 | 112 | 135 | 147 | 114 | 127 | 142 | 217 | 1175 |
| M | 107 | 142 | 169 | 106 | 112 | 135 | 145 | 114 | 125 | 144 | 217 | 1170 |
| O | 106 | 142 | 169 | 104 | 112 | 135 | 146 | 114 | 125 | 143 | 217 | 1175 |
| O | 107 | 142 | 169 | 104 | 112 | 135 | 143 | 114 | 127 | 144 | 217 | 1170 |
| O | 106 | 142 | 169 | 104 | 112 | 135 | 145 | 114 | 126 | 144 | 217 | 1175 |
| O | 106 | 142 | 169 | 105 | 112 | 135 | 145 | 114 | 125 | 143 | 217 | 1170 |
| O | 106 | 142 | 168 | 105 | 112 | 139 | 147 | 114 | 126 | 142 | 217 | 1170 |
| O | 106 | 142 | 170 | 104 | 112 | 135 | 146 | 114 | 126 | 142 | 217 | 1175 |
| O | 105 | 142 | 168 | 104 | 112 | 135 | 145 | 114 | 125 | 141 | 217 | 1175 |
| O | 106 | 142 | 169 | 104 | 112 | 135 | 145 | 114 | 126 | 143 | 217 | 1175 |
| O | 106 | 142 | 169 | 103 | 112 | 135 | 144 | 114 | 125 | 142 | 217 | 1175 |
| O | 106 | 142 | 169 | 104 | 113 | 135 | 144 | 114 | 127 | 143 | 217 | 1175 |
| O | 106 | 142 | 169 | 104 | 112 | 135 | 144 | 114 | 127 | 142 | 217 | 1175 |
| O | 105 | 142 | 169 | 103 | 112 | 135 | 145 | 114 | 128 | 142 | 217 | 1170 |
| O | 105 | 142 | 168 | 104 | 112 | 135 | 145 | 114 | 126 | 144 | 217 | 1175 |
| O | 106 | 142 | 169 | 104 | 113 | 135 | 145 | 114 | 128 | 142 | 217 | 1170 |
| O | 106 | 142 | 168 | 104 | 112 | 135 | 144 | 114 | 126 | 142 | 217 | 1175 |
| O | 106 | 141 | 169 | 104 | 112 | 135 | 144 | 114 | 125 | 142 | 217 | 1175 |
| O | 106 | 142 | 169 | 104 | 112 | 135 | 146 | 114 | 126 | 144 | 217 | 1175 |
| O | 106 | 142 | 169 | 103 | 112 | 135 | 144 | 114 | 125 | 142 | 217 | 1175 |
| O | 106 | 142 | 169 | 104 | 112 | 135 | 144 | 114 | 127 | 142 | 217 | 1175 |
| O | 105 | 142 | 169 | 104 | 112 | 135 | 145 | 114 | 127 | 140 | 217 | 1170 |
| O | 106 | 142 | 169 | 104 | 112 | 135 | 144 | 114 | 127 | 143 | 217 | 1170 |
| O | 106 | 142 | 169 | 104 | 112 | 135 | 145 | 113 | 125 | 144 | 217 | 1175 |
| O | 106 | 142 | 168 | 104 | 112 | 135 | 147 | 114 | 125 | 145 | 217 | 1170 |
| O | 106 | 142 | 168 | 104 | 112 | 135 | 145 | 114 | 128 | 144 | 217 | 1170 |
| O | 106 | 142 | 169 | 104 | 112 | 136 | 145 | 114 | 125 | 144 | 217 | 1175 |
| O | 107 | 141 | 169 | 104 | 112 | 135 | 144 | 114 | 126 | 144 | 217 | 1175 |
| O | 106 | 142 | 169 | 105 | 112 | 135 | 147 | 114 | 126 | 140 | 217 | 1175 |
| O | 106 | 142 | 169 | 104 | 112 | 135 | 145 | 114 | 127 | 144 | 217 | 1175 |
| O | 106 | 142 | 169 | 103 | 112 | 135 | 144 | 114 | 125 | 142 | 217 | 1170 |
| O | 106 | 142 | 169 | 104 | 112 | 135 | 146 | 114 | 126 | 142 | 217 | 1175 |
| O | 106 | 142 | 168 | 105 | 112 | 135 | 146 | 114 | 126 | 144 | 217 | 1170 |
| O | 106 | 142 | 169 | 104 | 112 | 135 | 147 | 114 | 124 | 143 | 217 | 1175 |
